# Supplementary material for: A SMARTTR workflow for multi-ensemble atlas mapping and brain-wide network analysis
Source: eLife. 2025 Jul 25;13:RP101327. doi: 10.7554/eLife.101327 (PMC12296265; doi:10.7554/eLife.101327)
Supplement: Figure 2—source data 1. [file elife-101327-fig2-data1.xlsx]

## Sheet: Latency by trial
Trial	CT					IS
1	0	0	0	0	0.23	1.37	11.36	15	1	2.62	2.75
2	0	0	0.61	0	0.37	4.13	15.02	15	4.51	2.34	6.48
3	0	0	0.44	0.19	0.53	3	15.02	15	5.91	2.47	15.02
4	0	0	0	0.38	0.4	4.91	15.02	15	5.21	5.69	4.97
5	0.45	0.59	1.31	2.25	0.61	2.89	15.02	15	3.73	3.85	13.03
6	0.23	0.41	1.04	0.54	0.67	3.92	4.5	15	9.36	3.93	15.02
7	0	0	1.03	0	0.91	3.86	7.02	15	6.42	6.46	15.02
8	1.1	0.21	0.26	0.65	0.34	4.87	1.69	15	1.59	2.4	15.02
9	0.35	0	0.57	0.5	0.36	2.45	5.82	15	5.9	8.66	15.02
10	0	1.07	0.38	0.64	0.74	7.1	2.8	15	2.73	8.69	8.81
11	0.95	0.61	1.05	0.59	0.57	1.43	15.02	15	5.58	7.14	15.02
12	0.53	0	0.93	1.18	1.46	4.02	2.7	15	2.06	9.11	3.58
13	0.51	0.37	1.41	0.63	0.65	3.03	1.82	15	15.02	15.02	0.77
14	0.9	0	0.66	1.12	0.27	5.82	2.6	15	5.83	15.02	15.02
15	0.79	0.61	1.76	0.61	1.71	5.48	1.81	15	13.25	8.22	15.02
16	0.62	0.37	0.96	1.57	0.35	6.56	15.02	15	1.67	2.2	15.02
17	0.92	0.59	0.13	0.77	0.53	8.31	15.02	15	12.04	11.42	15.02
18	0.95	0.72	1.08	0	0.5	8.85	1.51	15	15.02	15.02	15.02
19	0.47	0.42	0.28	0.71	0.48	4.34	4.04	15	14.6	15.02	15.02
20	0.98	0.35	1.05	0.52	1.3	15	15.02	15	5.94	15.02	15.02
21	0.65	0.92	0.34	0.95	0.78	15	4.52	15	7.58	4.71	15.02
22	0.59	0.23	1.73	0.76	0.87	6.53	2.8	15	12.69	15.02	15.02
23	0.47	0.68	0.77	0.85	6.01	7.32	15.02	15	0.1	8.29	15.02
24	1.21	0.42	1.4	0.7	2.96	2.19	3.36	15	8.62	13.88	15.02
25	1.17	0.93	1.08	0.84	0.62	7.79	2.37	15	15.02	14.11	15.02
26	0.98	1.02	0.68	3.23	0.47	5.77	2.88	15	15.02	12.73	15.02
27	1.67	0	1.82	0.68	0.72	9.31	1.48	15	15.02	8.16	13.38
28	0.72	0.97	0.85	0.85	0.61	1.8	4.75	15	11.97	1.42	15.02
29	1.25	2.17	1.14	1.03	3.87	6.31	0.63	15	15.02	3.26	15.02
30	0.75	0.25	1.1	0.51	3.16	9.03	6.39	15	7.79	15.02	1.42

## Sheet: Average Latency Trials 11-30
CT					IS
0.854	0.5815	1.011	0.905	1.3945	6.6945	5.938	15	9.992	10.4895	12.9735

## Sheet: IR beam Breaks
CT					IS
241	358	306	272	206	110	3	99	127	160	122
