# Supplementary material for: A SMARTTR workflow for multi-ensemble atlas mapping and brain-wide network analysis
Source: eLife. 2025 Jul 25;13:RP101327. doi: 10.7554/eLife.101327 (PMC12296265; doi:10.7554/eLife.101327)
Supplement: Supplementary file 1. [file elife-101327-supp1.xlsx]

## Sheet: across ages
Supplementary Table S1. Mouse Behavioral Statistics
Behavioral Paradigm	Measurement	Statistical Test	Comparison	F or t	° of freedom	p	*	Fig.
LH	Habituation activity (IR breaks)	Unpaired t-test	Shock vs Context	5.124	9	0.0006	***	1B
	Latency to cross (sec)	ANOVA	Time	0.9385	29	0.4345	-	1C
			Group	30.52	1	0.0004	***
			Time x Group	0.7244	29	0.8508	-
	Latency to cross (sec), Trials 11-30	Unpaired t-test	Shock vs Context	5.825	9	0.0003	***	1D
